# Supplementary material for: Behavioral Health and the Comprehensive Primary Care (CPC) Initiative: findings from the 2014 CPC behavioral health survey
Source: Springer Nature journal article supplement (doi:10.1186/s12913-017-2562-z), 2017-08-29
Supplement: MOESM2 [file 14937502]

**ADDITIONAL FILE 2: 2014 Behavioral Health Integration Survey item level responses**

| <b>Question</b>                             | <b>Answer options</b>                                                                                                                                                                                                                             | <b>Percentage of practices endorsing each response choice</b> | <b>Question mean (SD)</b> |
|---------------------------------------------|---------------------------------------------------------------------------------------------------------------------------------------------------------------------------------------------------------------------------------------------------|---------------------------------------------------------------|---------------------------|
| <b>Type of spatial arrangement employed</b> | Entirely separate space                                                                                                                                                                                                                           | 41                                                            | 2.39 (1.24)               |
|                                             | Mostly separate space: PCPs and BHPs spend little time with each other practicing in the same clinic. Patient has to see providers in at least two buildings.                                                                                     | 3                                                             |                           |
|                                             | Co-located space: Behavioral health and medical clinicians in different parts of the same building, spending some but not all their time in same medical clinic space. Patient typically has to move from primary care to behavioral health space | 32                                                            |                           |
|                                             | Fully shared space: Behavioral health and medical clinicians share the same provider rooms, spending all or most of their time seeing patients in that shared space. Typically, the clinicians see the patient in the same exam room.             | 24                                                            |                           |
| <b>Training: PCPs</b>                       | Do not address behavioral health care issues                                                                                                                                                                                                      | 4                                                             | 3.16 (0.87)               |
|                                             | Play a limited role in providing behavioral health care                                                                                                                                                                                           | 20                                                            |                           |
|                                             | Have been trained in principles of behavioral health care but largely rely on others to address these issues                                                                                                                                      | 34                                                            |                           |
|                                             | Have been trained in principles of behavioral health care and feel comfortable handling the majority of routine behavioral health needs                                                                                                           | 43                                                            |                           |
| <b>Training: Other clinical staff</b>       | Do not address behavioral health care issues                                                                                                                                                                                                      | 11                                                            | 2.28 (0.75)               |
|                                             | Play a limited role in providing behavioral health care                                                                                                                                                                                           | 58                                                            |                           |
|                                             | Have been trained in principles of behavioral health care but largely rely on others to address these issues                                                                                                                                      | 24                                                            |                           |

|                                                                          |                                                                                                                                                                     |    |             |
|--------------------------------------------------------------------------|---------------------------------------------------------------------------------------------------------------------------------------------------------------------|----|-------------|
|                                                                          | Have been trained in principles of behavioral health care and feel comfortable handling the majority of routine behavioral health needs as allowed by their license | 7  |             |
|                                                                          |                                                                                                                                                                     |    |             |
| <b>Training: Non-clinical staff</b>                                      | Do not address behavioral health care issues                                                                                                                        | 52 | 1.66 (0.84) |
|                                                                          | Are primarily tasked with managing patient flow and triage regarding behavioral health needs                                                                        | 34 |             |
|                                                                          | Provide some services such as assessment or screening for behavioral health conditions                                                                              | 9  |             |
|                                                                          | Perform key service roles that match their abilities and position                                                                                                   | 5  |             |
|                                                                          |                                                                                                                                                                     |    |             |
| <b>Access: Appointments with PCPs to address behavioral health needs</b> | Are not available at the practice                                                                                                                                   | 3  | 3.08 (0.77) |
|                                                                          | Can be scheduled by the practice with some flexibility in scheduling different visit lengths                                                                        | 17 |             |
|                                                                          | Provide flexibility and include capacity for same day visits                                                                                                        | 49 |             |
|                                                                          | Are flexible and can accommodate customized visit lengths, same day visits, schedule follow-up, and multiple provider visits                                        | 31 |             |
|                                                                          |                                                                                                                                                                     |    |             |
| <b>Access: Appointments with BHPs to address behavioral health needs</b> | Are not available at this practice                                                                                                                                  | 42 | 2.21(1.22)  |
|                                                                          | Can be scheduled by the practice with some flexibility in scheduling different visit lengths                                                                        | 20 |             |
|                                                                          | Provide flexibility and include capacity for same day visits                                                                                                        | 14 |             |
|                                                                          | Are flexible and can accommodate customized visit lengths, same day visits, schedule follow-up, and multiple provider visits                                        | 24 |             |
|                                                                          |                                                                                                                                                                     |    |             |
| <b>Communication and coordination: PCPs and BHPs</b>                     | Do not regularly communicate; BHPs are not part of the practice                                                                                                     | 22 | 2.43 (1.08) |
|                                                                          | Engage in periodic information exchanges with minimally shared care plans or workflows                                                                              | 38 |             |

|                                                                                                     |                                                                                                                                                                                                                                  |    |             |
|-----------------------------------------------------------------------------------------------------|----------------------------------------------------------------------------------------------------------------------------------------------------------------------------------------------------------------------------------|----|-------------|
|                                                                                                     | Engage in regular communication and coordination, usually via separate systems and workflows, but with care plans coordinated to a significant extent                                                                            | 16 |             |
|                                                                                                     | Have regular communication facilitated and/or clinical workflows that ensure effective communication and coordination                                                                                                            | 24 |             |
|                                                                                                     |                                                                                                                                                                                                                                  |    |             |
| <b>Communication and coordination:<br/>Case review</b>                                              | PCPs and BHPs do not meet regularly to review cases                                                                                                                                                                              | 63 | 1.61 (0.94) |
|                                                                                                     | PCPS and BHPS meet periodically to conduct caseload review on patients who are not improving                                                                                                                                     | 22 |             |
|                                                                                                     | PCPS and BHPs meet routinely to conduct caseload review on patients who are not improving                                                                                                                                        | 7  |             |
|                                                                                                     | PCPs and BHPs meet routinely to conduct caseload review on patients who are not improving; BHPs provide specific recommendations for treatment changes or referrals, and provide psychiatric assessment when indicated           | 8  |             |
|                                                                                                     |                                                                                                                                                                                                                                  |    |             |
| <b>Treatment planning: Shared PC and<br/>BH treatment plans</b>                                     | Are not routinely developed or recorded                                                                                                                                                                                          | 25 | 2.24 (0.99) |
|                                                                                                     | Are developed and recorded but reflect PCP and BHPs separate priorities only                                                                                                                                                     | 40 |             |
|                                                                                                     | Are developed collaboratively with PCPs and BHPs and include behavioral self-management and clinical goals, but they are not routinely used to guide subsequent care                                                             | 21 |             |
|                                                                                                     | Are developed collaboratively with PCPS and BHPS as well as patients and families, include behavioral self-management and clinical management goals, are routinely recorded, and guide care at every subsequent point of service | 14 |             |
|                                                                                                     |                                                                                                                                                                                                                                  |    |             |
| <b>Treatment planning: EHR or separate<br/>registries for behavioral health<br/>treatment needs</b> | Are not available to practice teams for pre-visit planning or patient outreach                                                                                                                                                   | 39 | 2.09 (1.05) |
|                                                                                                     | Are available to practice teams but are not routinely used for pre-visit planning or patient outreach                                                                                                                            | 26 |             |

|                                                                                                                                    |                                                                                                                                                                                                 |    |             |
|------------------------------------------------------------------------------------------------------------------------------------|-------------------------------------------------------------------------------------------------------------------------------------------------------------------------------------------------|----|-------------|
|                                                                                                                                    | Are available to practice teams and routinely used for pre-visit planning or patient outreach, but only for a limited number of behavioral health disorders and risk states                     | 24 |             |
|                                                                                                                                    | Are available to practice teams and routinely used for pre-visit planning and patient outreach, across a comprehensive set of behavioral health disorders and risk states                       | 12 |             |
|                                                                                                                                    |                                                                                                                                                                                                 |    |             |
| <b>Treatment planning: Linking patients to supportive community-based resources for patients with behavioral health care needs</b> | Is not provided systematically                                                                                                                                                                  | 8  | 2.75 (0.87) |
|                                                                                                                                    | Is limited to providing patients a list of identified community resources in an accessible format                                                                                               | 29 |             |
|                                                                                                                                    | Is accomplished through a designated staff person or resource responsible for connecting patients with community resources                                                                      | 42 |             |
|                                                                                                                                    | Is accomplished through active coordination between the health system, community service agencies, and patients and accomplished by a designated staff person                                   | 21 |             |
|                                                                                                                                    |                                                                                                                                                                                                 |    |             |
| <b>Treatment planning: Follow up for patients with behavioral health needs</b>                                                     | Generally does not occur because the information is not available to the primary care team                                                                                                      | 11 | 2.65 (0.87) |
|                                                                                                                                    | Occurs only if a behavioral health provider alerts the primary care practice                                                                                                                    | 30 |             |
|                                                                                                                                    | Occurs because the primary care practice makes proactive efforts to identify patients with behavioral health needs                                                                              | 44 |             |
|                                                                                                                                    | Is done routinely because the primary care practice has arrangements in place with behavioral health providers to both track these patients and ensure that follow-up is completed as indicated | 16 |             |
|                                                                                                                                    |                                                                                                                                                                                                 |    |             |
| <b>Resources for behavioral health care needs: Staff, resources and time for integrated behavioral health care</b>                 | Are not readily available at this practice                                                                                                                                                      | 19 | 2.38 (0.95) |
|                                                                                                                                    | Are occasionally available but are limited in scope (due to some limitations in either staff, resources, or time)                                                                               | 38 |             |

|                                             |                                                                                                                                                                                                              |    |             |
|---------------------------------------------|--------------------------------------------------------------------------------------------------------------------------------------------------------------------------------------------------------------|----|-------------|
|                                             | Are generally available and usually at the level needed                                                                                                                                                      | 29 |             |
|                                             | Are all fully available in the practice at all times                                                                                                                                                         | 14 |             |
|                                             |                                                                                                                                                                                                              |    |             |
| <b>Screening: Depression/mood disorders</b> | The practice does not screen for this disorder                                                                                                                                                               | 3  | 3.47 (0.75) |
|                                             | The practice screens for this disorder once per year                                                                                                                                                         | 6  |             |
|                                             | The practice screens for this disorder when clinically indicated                                                                                                                                             | 31 |             |
|                                             | The practice screens for this disorder at predetermined intervals and when clinically indicated                                                                                                              | 60 |             |
|                                             |                                                                                                                                                                                                              |    |             |
| <b>Outcomes: Depression/mood disorders</b>  | The practice does not regularly provide care for patients with this condition                                                                                                                                | 1  | 3.01 (0.91) |
|                                             | The practice treats this condition but does not have any specific treatment target                                                                                                                           | 37 |             |
|                                             | The practice treats this condition and has a treatment target                                                                                                                                                | 22 |             |
|                                             | The practice treats this condition with a target, monitors regularly for treatment response, and adjusts treatment when clinically indicated, including when needed to manage side effects and complications | 40 |             |
|                                             |                                                                                                                                                                                                              |    |             |
| <b>Screening: Anxiety</b>                   | The practice does not screen for this disorder                                                                                                                                                               | 21 | 2.84 (1.05) |
|                                             | The practice screens for this disorder once per year                                                                                                                                                         | 2  |             |
|                                             | The practice screens for this disorder when clinically indicated                                                                                                                                             | 49 |             |
|                                             | The practice screens for this disorder at predetermined intervals and when clinically indicated                                                                                                              | 28 |             |
|                                             |                                                                                                                                                                                                              |    |             |
| <b>Outcomes: Anxiety</b>                    | The practice does not regularly provide care for patients with this condition                                                                                                                                | 5  | 2.82 (0.97) |
|                                             | The practice treats this condition but does not have any specific treatment target                                                                                                                           | 42 |             |

|                                        |                                                                                                                                                                                                              |    |             |
|----------------------------------------|--------------------------------------------------------------------------------------------------------------------------------------------------------------------------------------------------------------|----|-------------|
|                                        | The practice treats this condition and has a treatment target                                                                                                                                                | 19 |             |
|                                        | The practice treats this condition with a target, monitors regularly for treatment response, and adjusts treatment when clinically indicated, including when needed to manage side effects and complications | 34 |             |
|                                        |                                                                                                                                                                                                              |    |             |
| <b>Screening: Pain</b>                 | The practice does not screen for this disorder                                                                                                                                                               | 17 | 2.89 (1.01) |
|                                        | The practice screens for this disorder once per year                                                                                                                                                         | 4  |             |
|                                        | The practice screens for this disorder when clinically indicated                                                                                                                                             | 50 |             |
|                                        | The practice screens for this disorder at predetermined intervals and when clinically indicated                                                                                                              | 29 |             |
|                                        |                                                                                                                                                                                                              |    |             |
| <b>Outcomes: Pain</b>                  | The practice does not regularly provide care for patients with this condition                                                                                                                                | 9  | 2.89 (1.03) |
|                                        | The practice treats this condition but does not have any specific treatment target                                                                                                                           | 31 |             |
|                                        | The practice treats this condition and has a treatment target                                                                                                                                                | 21 |             |
|                                        | The practice treats this condition with a target, monitors regularly for treatment response, and adjusts treatment when clinically indicated, including when needed to manage side effects and complications | 39 |             |
|                                        |                                                                                                                                                                                                              |    |             |
| <b>Screening: Alcohol use disorder</b> | The practice does not screen for this disorder                                                                                                                                                               | 13 | 3.09 (1.04) |
|                                        | The practice screens for this disorder once per year                                                                                                                                                         | 11 |             |
|                                        | The practice screens for this disorder when clinically indicated                                                                                                                                             | 31 |             |
|                                        | The practice screens for this disorder at predetermined intervals and when clinically indicated                                                                                                              | 45 |             |
|                                        |                                                                                                                                                                                                              |    |             |

|                                       |                                                                                                                                                                                                              |    |             |
|---------------------------------------|--------------------------------------------------------------------------------------------------------------------------------------------------------------------------------------------------------------|----|-------------|
| <b>Outcomes: Alcohol use disorder</b> | The practice does not regularly provide care for patients with this condition                                                                                                                                | 29 | 2.18 (1.08) |
|                                       | The practice treats this condition but does not have any specific treatment target                                                                                                                           | 39 |             |
|                                       | The practice treats this condition and has a treatment target                                                                                                                                                | 16 |             |
|                                       | The practice treats this condition with a target, monitors regularly for treatment response, and adjusts treatment when clinically indicated, including when needed to manage side effects and complications | 16 |             |
| <b>Screening: Cognitive function</b>  | The practice does not screen for this disorder                                                                                                                                                               | 14 | 2.89 (0.93) |
|                                       | The practice screens for this disorder once per year                                                                                                                                                         | 6  |             |
|                                       | The practice screens for this disorder when clinically indicated                                                                                                                                             | 56 |             |
|                                       | The practice screens for this disorder at predetermined intervals and when clinically indicated                                                                                                              | 24 |             |
| <b>Outcomes: Cognitive function</b>   | The practice does not regularly provide care for patients with this condition                                                                                                                                | 14 | 2.49 (0.99) |
|                                       | The practice treats this condition but does not have any specific treatment target                                                                                                                           | 46 |             |
|                                       | The practice treats this condition and has a treatment target                                                                                                                                                | 18 |             |
|                                       | The practice treats this condition with a target, monitors regularly for treatment response, and adjusts treatment when clinically indicated, including when needed to manage side effects and complications | 22 |             |
